# Supplementary material
Source: publisher figshare collection journal article supplement (https://acs.figshare.com/ndownloader/files/4771309)
Supplement: Supplementary file 1 [file 4771309]

## Supporting Information

### Novel 2-Aminopyrimidine carbamates as Potent and Orally Active Inhibitors of Lck: Synthesis, SAR, and *In Vivo* Anti-inflammatory Activity

Matthew W. Martin,<sup>\*,†</sup> John Newcomb,<sup>\*,†</sup> Joseph J. Nunes,<sup>†</sup> David C. McGowan,<sup>†</sup> David A. Armistead,<sup>†</sup> Christina Boucher,<sup>†</sup> John L. Buchanan,<sup>†</sup> William Buckner,<sup>†</sup> Lilly Chai,<sup>†</sup> Daniel Elbaum,<sup>†</sup> Linda F. Epstein,<sup>†</sup> Theodore Faust,<sup>†</sup> Shaun Flynn,<sup>†</sup> Paul Gallant,<sup>†</sup> Anu Gore,<sup>‡</sup> Yan Gu,<sup>†</sup> Faye Hsieh,<sup>§</sup> Xin Huang,<sup>†</sup> Josie H. Lee,<sup>†</sup> Daniela Metz,<sup>‡</sup> Scot Middleton,<sup>‡</sup> Deanna Mohn,<sup>‡</sup> Kurt Morgenstern,<sup>†</sup> Michael J. Morrison,<sup>†</sup> Perry M. Novak,<sup>†</sup> Antonio Oliveira-dos-Santos,<sup>†</sup> David Powers,<sup>+</sup> Paul Rose,<sup>†</sup> Stephen Schneider,<sup>†</sup> Stephanie Sell,<sup>†</sup> Yanyan Tudor,<sup>+</sup> Susan M. Turci,<sup>†</sup> Andrew A. Welcher,<sup>+</sup> Ryan D. White,<sup>†</sup> Debra Zack,<sup>‡</sup> Huilin Zhao,<sup>†</sup> Li Zhu,<sup>‡</sup> Xiaotian Zhu,<sup>†</sup> Chiara Ghiron,<sup>†</sup> Patricia Amouzegh,<sup>†</sup> Monika Ermann,<sup>†</sup> James Jenkins,<sup>†</sup> David Johnston,<sup>†</sup> Spencer Napier,<sup>†</sup> Eoin Power<sup>†</sup>

*Department of Chemistry Research and Discovery, Amgen Inc., One Kendall Square, Bldg. 1000, Cambridge, MA 02139, Department of Chemistry Research and Discovery, Department of Inflammation, Department of Pharmaceuticals, and Department of Pharmacokinetics & Drug Metabolism, Amgen Inc., One Amgen Center Drive, Thousand Oaks, CA 91320, and Evotec OAI, 151 Milton Park, Abingdon, Oxon OX14 4SD, UK*

Summary of Combustion analysis for compounds synthesized.....S2

Data collection and refinement statistics for X-ray structure of compound **43** bound to Lck.....S4

**Table S1. Combustion Analysis results**

| No. | Name                                                                                                                                   | Formula                                                                                 | Calcd                             | Found                             |
|-----|----------------------------------------------------------------------------------------------------------------------------------------|-----------------------------------------------------------------------------------------|-----------------------------------|-----------------------------------|
| 26  | 2,6-dimethylphenyl 4-(methyloxy)phenyl(2-((4-(4-methyl-1-piperazinyl)phenyl)amino)-4-pyrimidinyl)carbamate                             | C <sub>31</sub> H <sub>34</sub> N <sub>6</sub> O <sub>3</sub><br>·0.9 H <sub>2</sub> O  | C, 67.10;<br>H, 6.50;<br>N, 15.15 | C, 67.26;<br>H, 6.87;<br>N, 14.96 |
| 27  | 2,6-dimethylphenyl 4-fluoro-2-((1-methylethyl)oxy)phenyl(2-((4-(4-methyl-1-piperazinyl)phenyl)amino)-4-pyrimidinyl)carbamate           | C <sub>33</sub> H <sub>37</sub> FN <sub>6</sub> O <sub>3</sub>                          | C, 67.79;<br>H, 6.38;<br>N, 14.37 | C, 68.07;<br>H, 6.50;<br>N, 14.23 |
| 28  | 2,6-dimethylphenyl 2,4-bis(methyloxy)phenyl(2-((4-(4-methyl-1-piperazinyl)phenyl)amino)-4-pyrimidinyl)carbamate                        | C <sub>32</sub> H <sub>36</sub> N <sub>6</sub> O <sub>4</sub><br>·0.2 H <sub>2</sub> O  | C, 67.16;<br>H, 6.41;<br>N, 14.69 | C, 67.10;<br>H, 6.52;<br>N, 14.41 |
| 29  | 2,6-dimethylphenyl (2,5-bis(methyloxy)phenyl)methyl(2-((4-(4-methyl-1-piperazinyl)phenyl)amino)-4-pyrimidinyl)carbamate                | C <sub>33</sub> H <sub>38</sub> N <sub>6</sub> O <sub>4</sub>                           | C, 68.02;<br>H, 6.57;<br>N, 14.42 | C, 67.59;<br>H, 6.77;<br>N, 14.19 |
| 30  | 2,6-dimethylphenyl 2-((4-(4-methyl-1-piperazinyl)phenyl)amino)-4-pyrimidinyl(2-naphthalenyl)carbamate                                  | C <sub>34</sub> H <sub>34</sub> N <sub>6</sub> O <sub>2</sub>                           | C, 73.10;<br>H, 6.13;<br>N, 15.04 | C, 72.09;<br>H, 6.42;<br>N, 14.21 |
| 31  | 2,6-dimethylphenyl 1,1'-biphenyl-4-yl(2-((4-(4-methyl-1-piperazinyl)phenyl)amino)-4-pyrimidinyl)carbamate                              | C <sub>36</sub> H <sub>36</sub> N <sub>6</sub> O <sub>2</sub>                           | C, 73.95;<br>H, 6.21;<br>N, 14.37 | C, 74.12;<br>H, 6.34;<br>N, 14.25 |
| 32  | 2,6-dimethylphenyl 1,1'-biphenyl-3-yl(2-((4-(4-methyl-1-piperazinyl)phenyl)amino)-4-pyrimidinyl)carbamate                              | C <sub>36</sub> H <sub>36</sub> N <sub>6</sub> O <sub>2</sub><br>·0.9 H <sub>2</sub> O  | C, 71.95;<br>H, 6.34;<br>N, 13.99 | C, 72.09;<br>H, 6.16;<br>N, 13.70 |
| 35  | 2,6-dimethylphenyl 2,4-bis(methyloxy)phenyl(2-((3-fluoro-4-(4-methyl-1-piperazinyl)phenyl)amino)-4-pyrimidinyl)carbamate               | C <sub>32</sub> H <sub>35</sub> FN <sub>6</sub> O <sub>4</sub>                          | C, 65.51;<br>H, 6.01;<br>N, 14.33 | C, 65.53;<br>H, 6.12;<br>N, 14.13 |
| 36  | 2,6-dimethylphenyl 2,4-bis(methyloxy)phenyl(2-((4-((2-(dimethylamino)ethyl)-oxy)phenyl)amino)-4-pyrimidinyl)carbamate                  | C <sub>31</sub> H <sub>35</sub> N <sub>5</sub> O <sub>5</sub>                           | C, 66.77;<br>H, 6.33;<br>N, 12.56 | C, 66.78;<br>H, 6.42;<br>N, 12.28 |
| 38  | 2,6-dimethylphenyl 2,4-bis(methyloxy)phenyl(2-((3-fluoro-4-((2-(4-methyl-1-piperazinyl)ethyl)oxy)phenyl)amino)-4-pyrimidinyl)carbamate | C <sub>34</sub> H <sub>39</sub> FN <sub>6</sub> O <sub>5</sub><br>·0.5 H <sub>2</sub> O | C, 63.84;<br>H, 6.30;<br>N, 13.14 | C, 63.89;<br>H, 6.23;<br>N, 12.83 |

|    |                                                                                                                                                    |                                                                                          |                                   |                                   |
|----|----------------------------------------------------------------------------------------------------------------------------------------------------|------------------------------------------------------------------------------------------|-----------------------------------|-----------------------------------|
| 39 | 2,6-dimethylphenyl 2-((3,5-bis(methyloxy)-4-((2-(4-methyl-1-piperazinyl)ethyl)oxy)phenyl)amino)-4-pyrimidinyl(2,4-bis(methyloxy)phenyl)carbamate   | C <sub>36</sub> H <sub>44</sub> N <sub>6</sub> O <sub>7</sub><br>·0.7 H <sub>2</sub> O   | C, 63.09;<br>H, 6.68;<br>N, 12.26 | C, 63.00;<br>H, 6.71;<br>N, 12.20 |
| 40 | 2,6-dimethylphenyl 2-((3,5-bis(methyloxy)-4-((2-(4-morpholinyl)ethyl)oxy)phenyl)amino)-4-pyrimidinyl(2,4-bis(methyloxy)phenyl)carbamate            | C <sub>35</sub> H <sub>41</sub> N <sub>5</sub> O <sub>8</sub><br>·0.7 H <sub>2</sub> O   | C, 62.52;<br>H, 6.36;<br>N, 10.42 | C, 62.57;<br>H, 6.32;<br>N, 10.37 |
| 41 | 2,6-dimethylphenyl 2,4-bis(methyloxy)phenyl(2-((4-((3-(1-piperidinyl)propyl)oxy)phenyl)amino)-4-pyrimidinyl)carbamate                              | C <sub>35</sub> H <sub>41</sub> N <sub>5</sub> O <sub>5</sub>                            | C, 68.72;<br>H, 6.76;<br>N, 11.45 | C, 68.78;<br>H, 7.09;<br>N, 11.10 |
| 43 | 2,6-dimethylphenyl 2-((3,5-bis(methyloxy)-4-((3-(4-methyl-1-piperazinyl)propyl)-oxy)phenyl)amino)-4-pyrimidinyl(2,4-bis(methyloxy)phenyl)carbamate | C <sub>37</sub> H <sub>46</sub> N <sub>6</sub> O <sub>7</sub><br>·0.3 H <sub>2</sub> O   | C, 64.20;<br>H, 6.79;<br>N, 12.14 | C, 64.19;<br>H, 6.89;<br>N, 12.25 |
| 44 | 2,6-dimethylphenyl 2,4-bis(methyloxy)phenyl(2-((3-fluoro-4-((3-(4-methyl-1-piperazinyl)propyl)oxy)phenyl)amino)-4-pyrimidinyl)carbamate            | C <sub>35</sub> H <sub>41</sub> FN <sub>6</sub> O <sub>5</sub><br>·0.5 H <sub>2</sub> O  | C, 64.30;<br>H, 6.48;<br>N, 12.86 | C, 64.27;<br>H, 6.59;<br>N, 12.77 |
| 45 | 2,6-dimethylphenyl 2,4-bis(methyloxy)phenyl(2-((3-fluoro-4-((3-(1-piperidinyl)propyl)oxy)phenyl)amino)-4-pyrimidinyl)carbamate                     | C <sub>35</sub> H <sub>40</sub> FN <sub>5</sub> O <sub>5</sub><br>·0.25 H <sub>2</sub> O | C, 66.28;<br>H, 6.44;<br>N, 11.04 | C, 66.27;<br>H, 6.54;<br>N, 10.95 |

**Crystal structure determination.** The kinase domain of human Lck (residues 225-501) with a C-terminal His6 tag was expressed in insect cells and purified by immobilized metal affinity, anion exchange, and size exclusion chromatographies. The protein was then phosphorylated by incubation with 5 mM  $\text{Mg}^{++}$ ·ATP for 10 min at room temperature. Phosphorylated Lck was further purified by anion exchange chromatography and concentrated to 10 mg/ml. Crystals were grown by vapor diffusion at 4 °C. Equal volumes of protein were mixed with a well solution consisting of 25-35 % (w/v) PEG 4000, 0.2 or 0.4 M lithium sulfate, and 0.1 M Tris (pH 8.5). These crystals belong to space group  $\text{P2}_1\text{2}_1\text{2}_1$  with unit cell dimensions  $a = 42.43 \text{ \AA}$ ,  $b = 73.53 \text{ \AA}$ , and  $c = 92.81 \text{ \AA}$ . There is one molecule per asymmetric unit. Diffraction data of the crystals of Lck with compound **43** were collected on Raxis IV<sup>++</sup> mounted on FR-E generator and processed using DENZO and SCALEPACK. (Otwinowski & Minor, 1997). The structure was solved by molecular replacement using AMORE (Navaza, 1994). Refinements were performed with CNX and model building was done in QUANTA (Accelrys, San Diego, CA). Data collection and refinement statistics are presented in Table S2.

#### References

- Otwinowski, Z.; Minor, W. Processing of X-ray diffraction data collected in oscillation mode. *Methods Enzymol.* **1997**, 276, 307-326.
- Navaza, J. *AMoRe*: an automated package for molecular replacement. *Acta Crystallogr. A* **1994**, 50, 157-163.

**Table S2. Data collection and refinement statistics**

| Lck + Compound <b>43</b>          |                     |
|-----------------------------------|---------------------|
| Data Collection                   |                     |
| Resolution (Å)                    | 30-2.00 (2.07-2.00) |
| Total reflections                 | 57666               |
| Unique reflections                | 20131               |
| Completeness (%)                  | 99.3 (99.6)         |
| R <sub>merge</sub>                | 0.042 (0.111)       |
| I/σ(I)                            | 21.0 (11.3)         |
| Refinement                        |                     |
| Reflections used                  | 20293               |
| R <sub>cryst</sub>                | 0.228               |
| R <sub>free</sub>                 | 0.291               |
| Average B-value (Å <sup>2</sup> ) | 16.1                |
| Number of protein atoms           | 2208                |
| Number of ligand atoms            | 51                  |
| Number of sulfate ions            | 1                   |
| Number of solvent atoms           | 312                 |
| r.m.s.d. bonds (Å)                | 0.012               |
| r.m.s.d. angles (°)               | 1.57                |
